# Supplementary material for: Extreme intratumour heterogeneity and driver evolution in mismatch repair deficient gastro-oesophageal cancer
Source: PubMed Central journal article supplement (PMC6965135; doi:10.1038/s41467-019-13915-7), 2020-01-16
Supplement: 41467_2019_13915_MOESM3_ESM.pdf [file 41467_2019_13915_MOESM3_ESM.pdf]

## **Description of Additional Supplementary Files**

File Name: Supplementary Data 1

Description: Mseq mutations calls and depths.

File Name: Supplementary Data 2

Description: Putative driver mutations.

File Name: Supplementary Data 3

Description: HLA mutation calls and LOH analysis.
